# Supplementary material for: Facile design of a dextran derived polyurethane hydrogel and metallopolymer: a sustainable approach for elimination of organic dyes and reduction of nitrophenols
Source: Royal Society of Chemistry journal article supplement (doi:10.1039/d0nj01871f), 2020-01-01
Supplement: d0nj01871f1.pdf [file d0nj01871f1.pdf]

**Facile design of dextran derived polyurethane hydrogel & metallopolymer: sustainable approach for elimination of organic dyes and reduction of nitrophenols**

Manita Das<sup>a</sup>, Monika Yadav<sup>c</sup>, Falguni Shukla<sup>a</sup>, Sagufa Ansari<sup>a</sup>, R.N. Jadeja<sup>a, c</sup> and

Sonal Thakore<sup>\*a,b</sup>

<sup>a</sup> Department of Chemistry, Faculty of Science, The Maharaja Sayajirao University of Baroda, Vadodara 390 002, India

<sup>b</sup> Institute of Interdisciplinary Studies, The Maharaja Sayajirao University of Baroda, Vadodara 390 002, India.

<sup>c</sup> Department of Environmental Studies, Faculty of Science, The Maharaja Sayajirao University of Baroda, Vadodara 390 002, India

\*Author for correspondence E-mail: chemistry2797@yahoo.com, drsonalit@gmail.com (Thakore. S.)

### **1.1 Protocol for assessment of adsorption**

Briefly, known amount of dried hydrogel were immersed in distilled water to attain equilibrium swelling state. The swollen hydrogel was then added into 50 mL of aqueous dye solutions of predetermined concentrations (50, 100, 150, 200 and 250 mg L<sup>-1</sup>) under stirring at room temperature for 24 hours. To determine the optimum amount of hydrogel to be used for further experiments different quantities of hydrogel (25, 50, 100, 150, 200mg) were added to 100mg L<sup>-1</sup> of MB and MO solution respectively. For pH variation study 100 mg L<sup>-1</sup> of dye solutions with different pH values were prepared and 100 mg of hydrogel was added to determine the fate of adsorption. The pH adjustments were done using NaOH and HCl solutions.

Using the optimized conditions kinetics experiments were performed at different time intervals. The effect of temperature on adsorption was also determined by performing the experiments at 35 °C and 45°C. For quantification of adsorption, supernatants were collected by

filtration after each set of adsorption experiment and measured using UV-Vis spectrophotometer (wavelength scan range: 200-800 nm) at  $\lambda_{\max} = 664$  for MB and  $\lambda_{\max} = 460$  for MO. The volume of supernatant removed is replenished by same volume of fresh dye solution to maintain uniform concentration of dye throughout the experiments. All the experiments were conducted in triplicate and mean values have been reported. The adsorption capacity, removal percentage and adsorption at particular time 't' were calculated using the formula:

$$q_e = \frac{(C_0 - C_e)}{m} \times V \text{ ----- (3)}$$

$$\%R_e = \frac{C_0 - C_e}{C_e} \times 100 \text{ ----- (4)}$$

$$q_t = \frac{C_t - C_e}{m} \times V \text{ ----- (5)}$$

where  $q_e$  is the adsorption capacity (mg/g),  $\%R_e$  denote removal efficiency and  $q_t$  represents the adsorption capacity at particular time 't' (mg/g);  $C_0$  is the initial concentration (mg L<sup>-1</sup>),  $C_e$  is equilibrium concentrations (mgL<sup>-1</sup>) and  $C_t$  denotes concentration at time 't' (mg L<sup>-1</sup>) of dyes in aqueous solution; 'V' represent the volume of dyes solution (L); and 'm' denotes the weight of the hydrogel (g).

## 1.2 Protocol for determining the swelling characteristics

### 1.2.1 Swelling Kinetics

100 mg air dried uniformed sized hydrogel was weighed and immersed in distilled water. Swollen gels were withdrawn from water and excess of solvent on surface was wiped off using tissue paper and weighed at predetermined time intervals. Weight determination was carried out upto the attainment of constant weight. Equilibrium Water Absorbency (EWA) was calculated using the formula:

$$WA = \frac{W_t - W_0}{W_0} \text{ ----- (1)}$$

Where,  $W_0$  (mg) and  $W_t$  (mg) are the weight of dry and swollen hydrogel samples.

### 1.2.2 pH and salt sensitivity

100 mg of dried hydrogel sample was immersed in buffer solution of different pH (2-12) at room temperature for assessment of pH dependent EWA. The pH values of buffer solutions were adjusted using 1 mol L<sup>-1</sup> NaOH and 1 mol L<sup>-1</sup> HCl. The equilibrium water absorbency was calculated using equation (1) at each pH value. Different concentration of KCl solution (0.2, 0.6, 1.0 wt %) was used to determine water uptake ability of hydrogel in salt solution using the same method.

### 1.2.3 Water Retention Capacity

To study the water retention capacity of the hydrogel at equilibrium known amount of air dried hydrogel sample was kept in distilled water for one day. Swollen hydrogel was removed and weighed at regular time interval to investigate water retention capacity. Water retention ratio was calculated using the formula:

$$WR(\%) = \frac{(W_t - W_0)}{(W_e - W_0)} \times 100 \text{ ----- (2)}$$

Where,  $W_0$  is the weight of initial dried hydrogel,  $W_e$  is the weight of swollen hydrogel at equilibrium and  $W_t$  is the weight of swollen hydrogel at time 't'.

## FIGURES

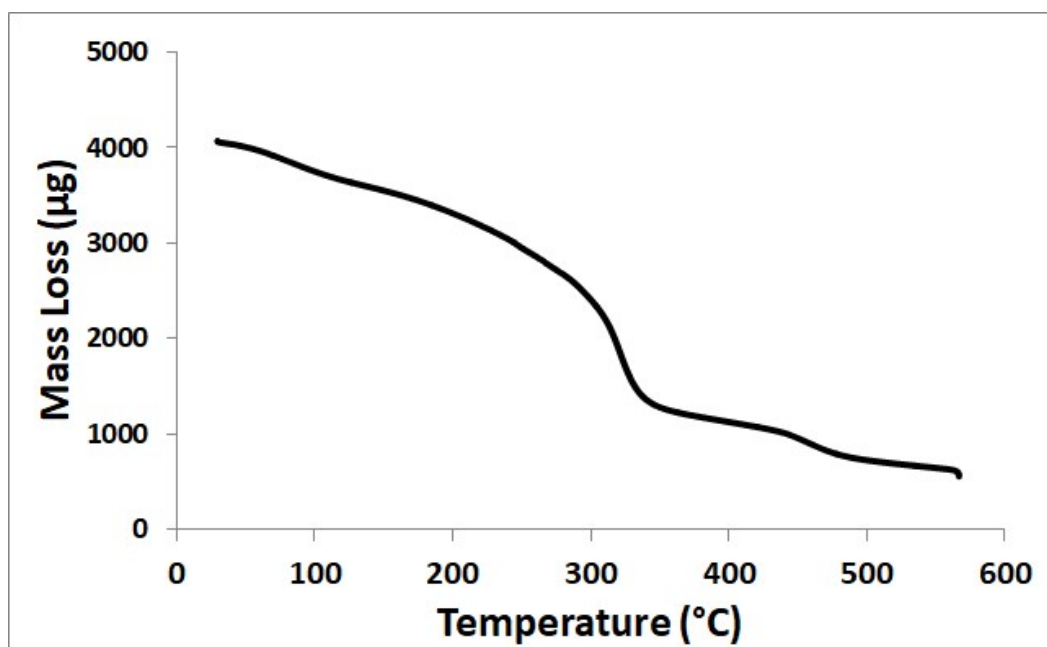

Figure S1: Thermogravimetric Curves for Hydrogel

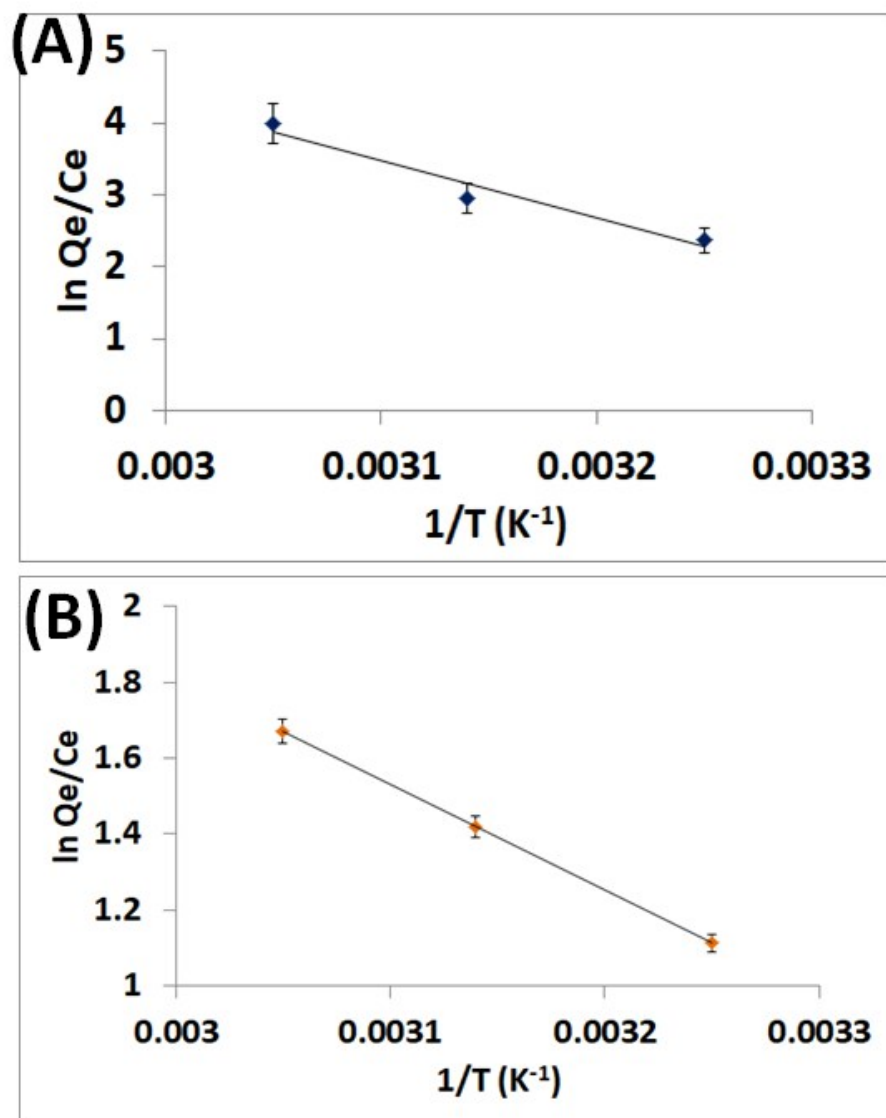

Figure S2: Thermodynamic plot for removal of (A) MB and (B) MO using hydrogel

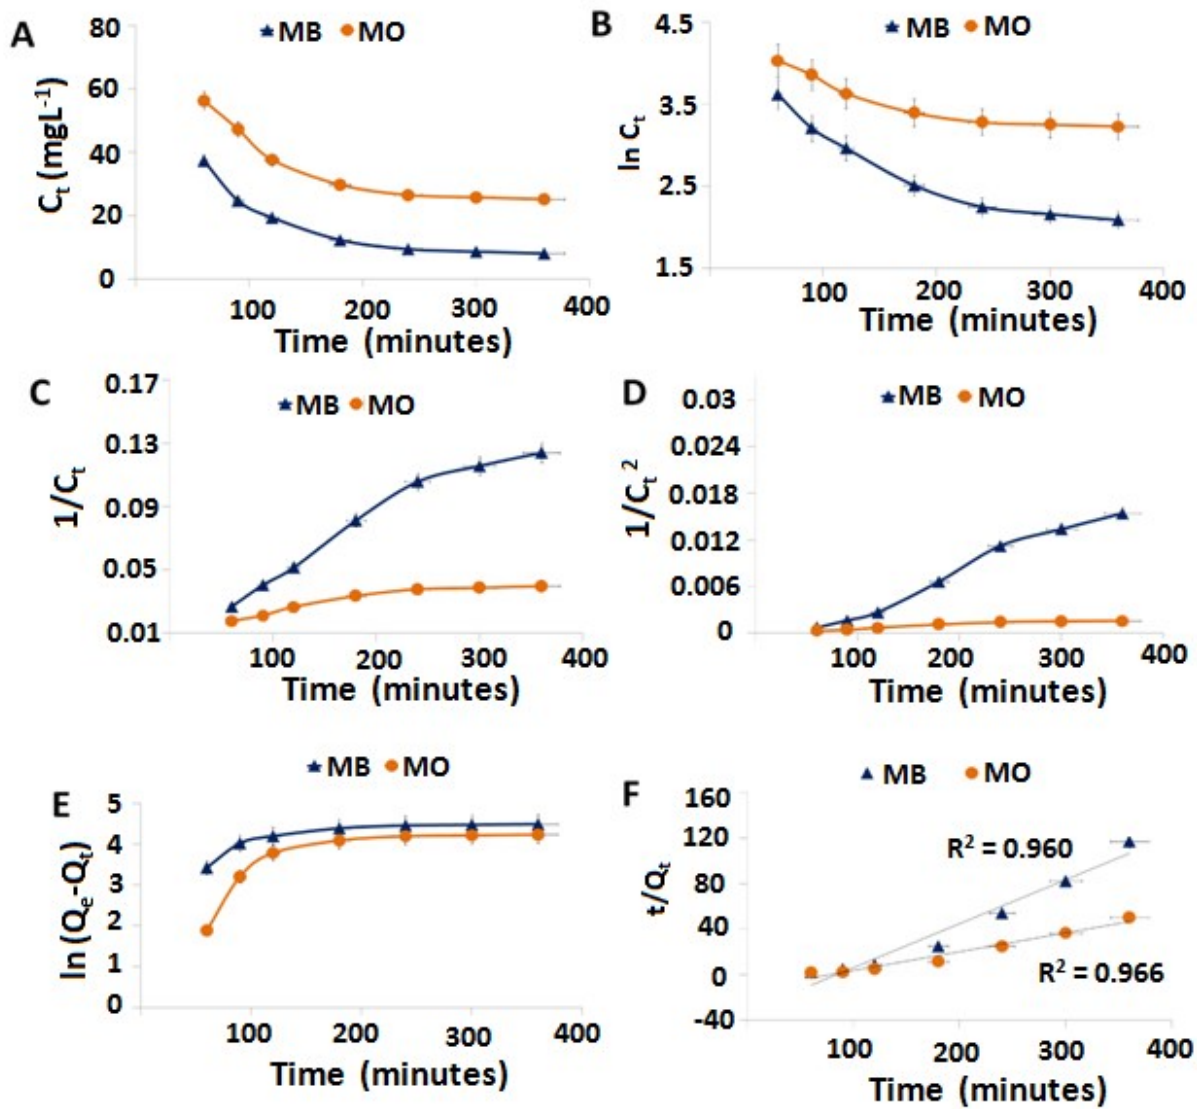

Figure S3: Graphs of (A) zero (B) first (C) second (D) third (E) pseudo first (F) pseudo second order kinetic models for adsorption of MB and MO on hydrogel (conditions: initial concentration 100 mgL<sup>-1</sup>, adsorbent dosage 0.1g at room temperature)

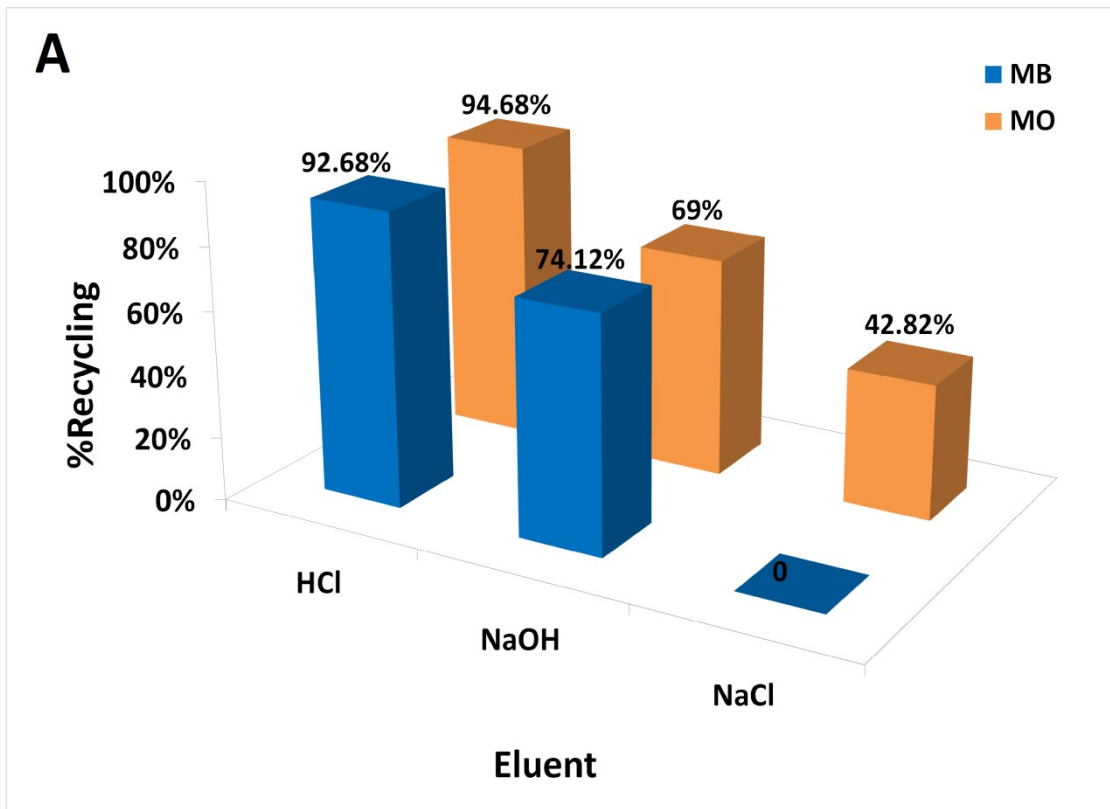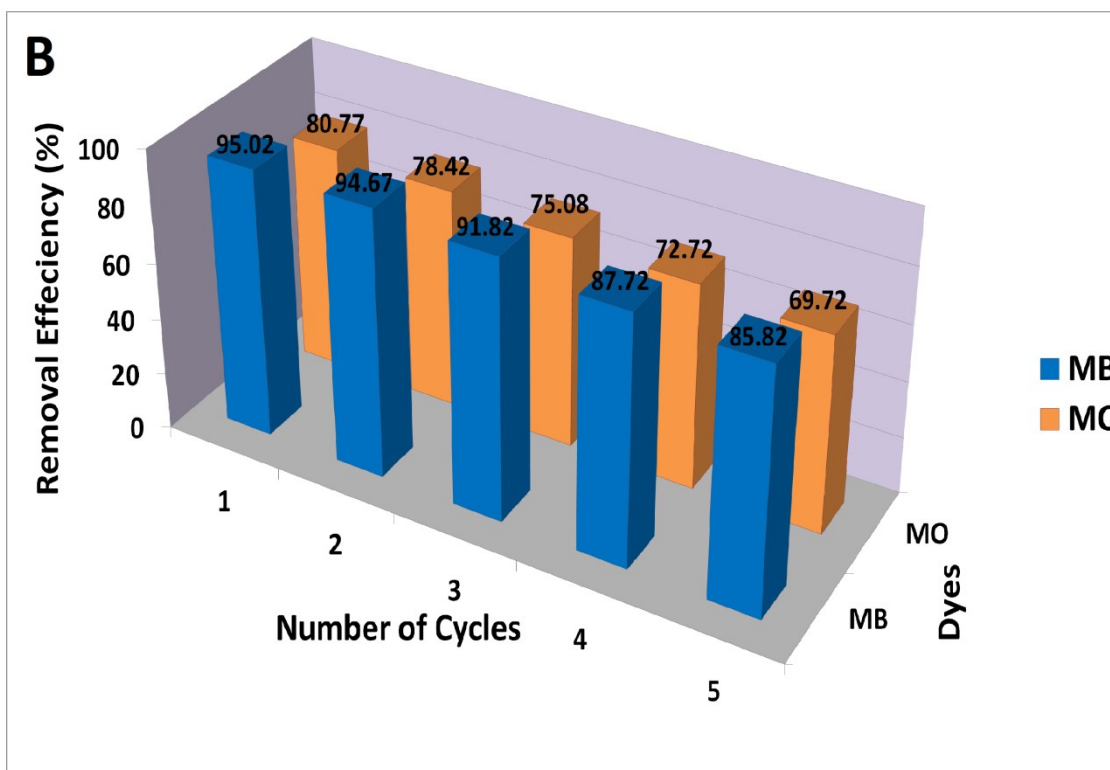

Figure S4: (A) Studies for desorption of dyes in different eluents (B) assessment of recyclability of the hydrogel

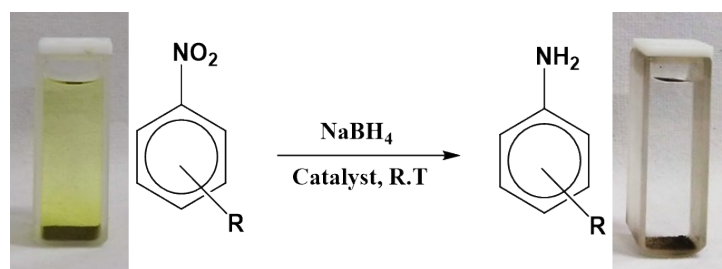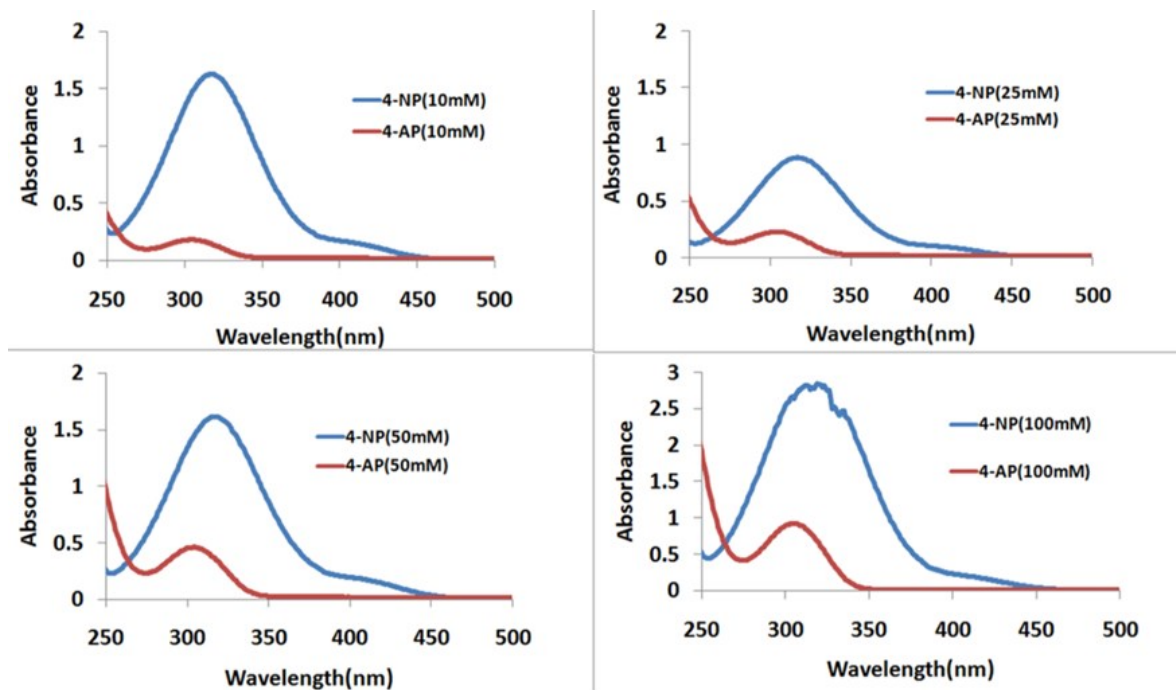

**Figure S5: General scheme for the reduction of nitroaromatics and UV-vis spectrophotometric determinations for reduction of varying concentrations of 4-NP using Ag@Hydrogel**



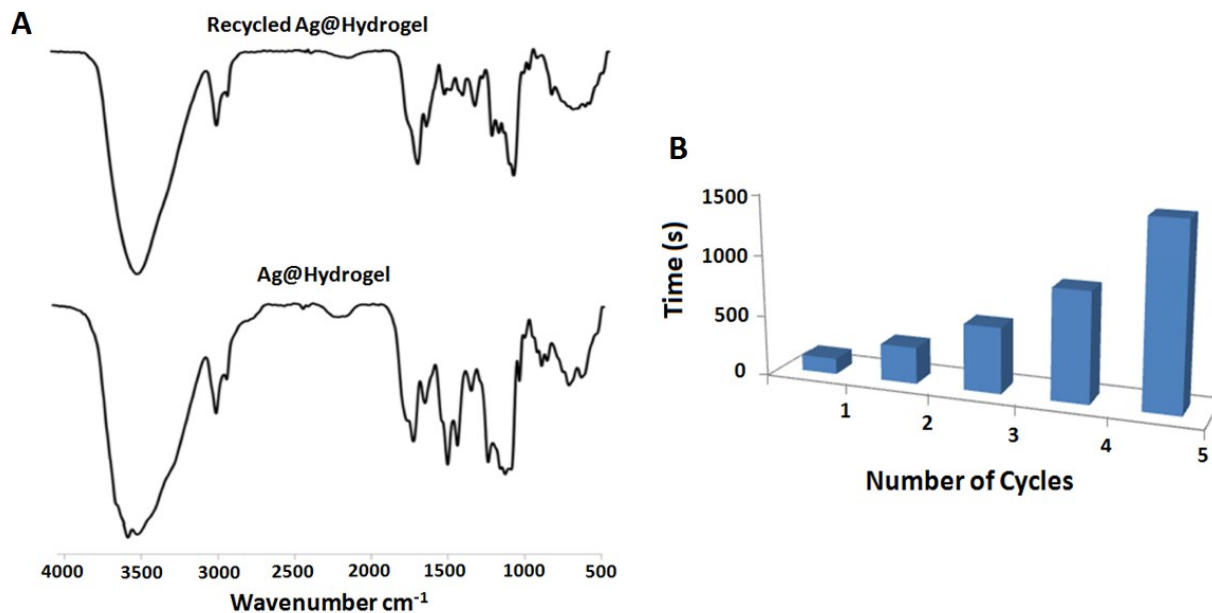

Figure S6: (A) FT-IR overlay of fresh and recycled metallopolymer (B) Recycling studies

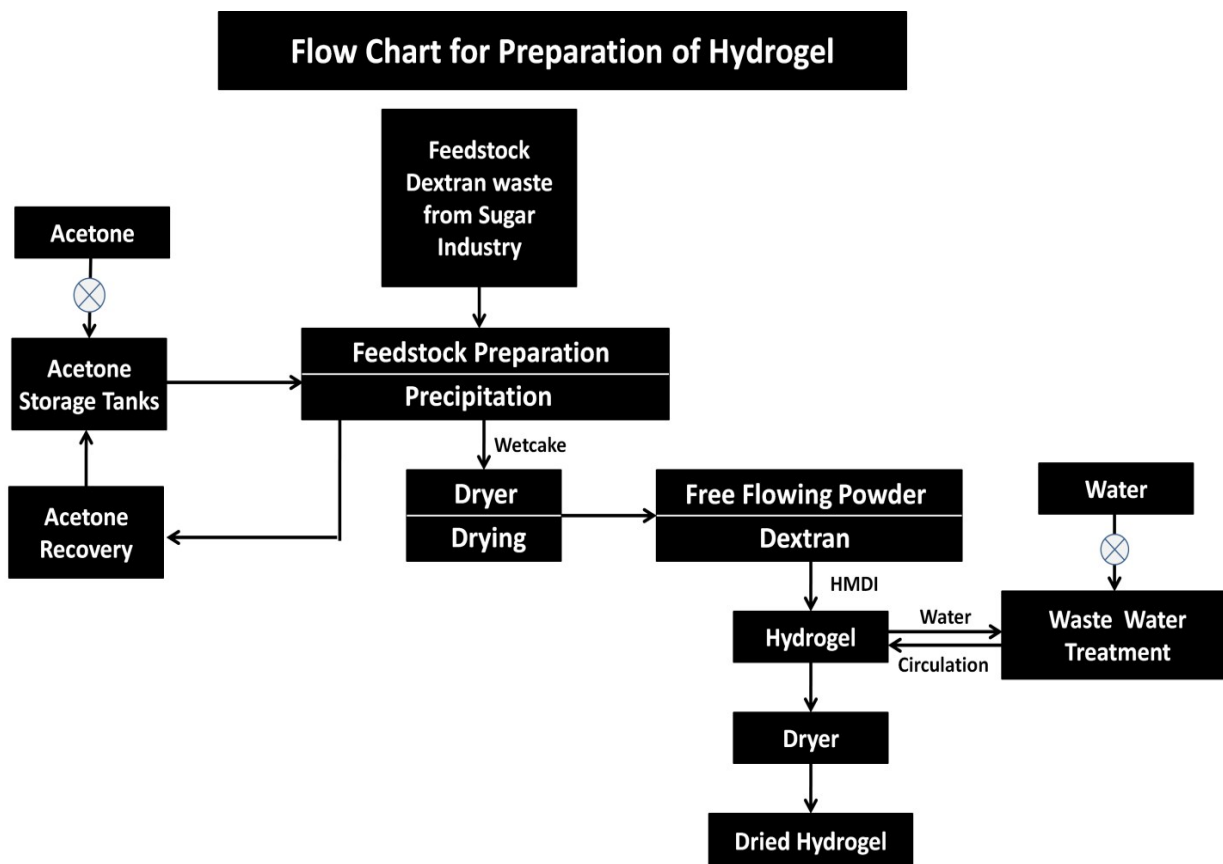

Figure S7: Process flow diagram for commercial production of dextran derived Hydrogels

## TABLES

**Table S1: Elemental Composition of Recycled Hydrogel following Adsorption/Desorption Cycle**

| Material     | C (wt-%) | N (wt-%) | O (wt-%) | Na (wt-%) | S (wt-%) | Cl (wt-%) |
|--------------|----------|----------|----------|-----------|----------|-----------|
| Hydrogel +MB | 51.90    | 2.74     | 45.23    | 0         | 0.11     | 0.02      |
| Hydrogel +MO | 54.83    | 0.67     | 44.26    | 0.10      | 0.14     | 0         |

**Table S2: Comparison of Removal Efficiencies of Hydrogel with Literature Reports:**

| Sr. No | Adsorbent                                                                       | Dye                                                                                                                 | Concentration | Q <sub>e</sub>                   | Reference |
|--------|---------------------------------------------------------------------------------|---------------------------------------------------------------------------------------------------------------------|---------------|----------------------------------|-----------|
| 1      | DexG (Amphiphilic Cationic Dextran hydrogel)                                    | Methyl Orange                                                                                                       | 1.5 mM        | 650-730 mg/g                     | [49]      |
| 2      | Alg/PASAP (alginate/polyaspartate hydrogel beads)                               | Malachite Green, Methylene Blue, Methyl Orange                                                                      | 10 mg/L       | 600-700 mg/g MB, 300-350 mg/g MG | [47]      |
| 3      | Poly (N-isopropylacrylamide/ Acrylic Acid/N-allylisatin) hydrogel nanoparticles | Methylene Blue (300mg L <sup>-1</sup> ), AuramineO(200 mg L <sup>-1</sup> ), Chrysoidine G (150mg L <sup>-1</sup> ) | 250 mg/L      | 584 mg/g                         | [50]      |
| 4      | poly(acrylic acid) (PAA)-based super-adsorbent nanocomposite Hydrogel           | Methylene Blue                                                                                                      | 100 mg/L      | 2000 mg/g                        | [28]      |
| 5      | Salecan/PAD hydrogels                                                           | Methyl Orange                                                                                                       | 10 mg/L       | 56.2 mg/g                        | [17]      |
| 6      | Supramolecular Complex of Graphene Oxide and Sulfonatocalix[4]areneHydrogel     | Methyl Orange                                                                                                       | 20mg/L        |                                  | [2]       |
| 7      | Graphene/Chitosan based Hydrogel                                                | Congo Red (CR)                                                                                                      | 100 mg/L      | 356 mg/g                         | [51]      |
| 8      | GO-hydrogel porous nanocomposites                                               | Methylene Blue                                                                                                      | 100 mg/L      | 714.29 mg/g                      | [52]      |
| 9      | graphene oxide/sodium alginate/ polyacrylamide nanocomposite hydrogel           | Methylene Blue<br>Methyl Orange                                                                                     |               | 2.62 mg/g,<br>1.24 mg/g          | [53]      |
| 10     | Sodium alginate poly itaconic acid (NaAlg/IA) hydrogel                          | Methylene Blue                                                                                                      | 80 mg/L       | 12.77 mg/g                       | [54]      |
| 11     | β – Cyclodextrin-                                                               | Nickel,                                                                                                             | 100 mg/L      | 18.6 mg/g                        | [55]      |

|    |                                                                           |                               |         |                    |           |
|----|---------------------------------------------------------------------------|-------------------------------|---------|--------------------|-----------|
|    | Cellulose / Hemicellulose-Based Hydrogels                                 | Cadmium                       |         | 42 mg/g            |           |
| 12 | Magnetic bentonite/ carboxymethyl chitosan/sodium alginate hydrogel beads | Copper                        | 50 mg/L | 56 mg/g            | [56]      |
| 13 | Dextran Hydrogel                                                          | Methylene Blue, Methyl Orange | 100mg/L | 98 mg/g<br>84 mg/g | This Work |

**Table S3: Elemental Composition of Ag@Hydrogel**

| Material    | C (wt %) | N (wt %) | O (wt %) | Ag (wt %) |
|-------------|----------|----------|----------|-----------|
| Hydrogel    | 50.67    | 0        | 49.33    | 0         |
| Ag@Hydrogel | 43.55    | 2.99     | 42.93    | 10.93     |

**Table S4: Reduction of 4-NP at Different Concentrations using Ag@Hydrogel as Catalyst**

| Sr.no | Quantity of Ag@hydrogel (mg) | Concentration of 4-Nitrophenol (mM) | Time (s) At room temperature | Time (s) In presence of sunlight |
|-------|------------------------------|-------------------------------------|------------------------------|----------------------------------|
| 1     | 10                           | 10                                  | 21                           | 10                               |
| 2     |                              | 25                                  | 55                           | 40                               |
| 3     |                              | 50                                  | 85                           | 48                               |
| 4     |                              | 100                                 | 130                          | 52                               |

**Reaction conditions:** All the reactions were carried using 50  $\mu$ L of 0.1 M 4-NP,  $5 \times 10^{-3}$ M NaBH<sub>4</sub>.
